# Supplementary material
Source: publisher site journal article supplement (http://kjim.org/upload/media/kjim-2020-629-suppl6.pdf)
Supplement: Supplementary file 1 [file kjim-2020-629-suppl6.pdf]

**Supplementary Table 6. Subgroup analyses<sup>a</sup>**

| Subgroup                   | Per 1 SD change in waist circumference |                             | Per 1 SD change in waist-height ratio |                             | Per 1 SD change in body roundness index |                             |
|----------------------------|----------------------------------------|-----------------------------|---------------------------------------|-----------------------------|-----------------------------------------|-----------------------------|
|                            | OR (95% CI)                            | <i>p</i> value <sup>b</sup> | OR (95% CI)                           | <i>p</i> value <sup>b</sup> | OR (95% CI)                             | <i>p</i> value <sup>b</sup> |
| Sex                        |                                        | 0.27                        |                                       | 0.17                        |                                         | 0.11                        |
| Male                       | 1.49 (1.17–1.88)                       |                             | 1.51 (1.18–1.94)                      |                             | 1.56 (1.21–2.02)                        |                             |
| Female                     | 1.24 (0.99–1.55)                       |                             | 1.20 (0.97–1.49)                      |                             | 1.20 (0.98–1.46)                        |                             |
| Age status, yr             |                                        | 0.87                        |                                       | 0.87                        |                                         | 0.77                        |
| 60–70                      | 1.35 (1.12–1.64)                       |                             | 1.30 (1.08–1.58)                      |                             | 1.29 (1.08–1.55)                        |                             |
| ≥ 70                       | 1.31 (0.97–1.77)                       |                             | 1.34 (0.99–1.82)                      |                             | 1.36 (1.01–1.83)                        |                             |
| Overweight/obesity         |                                        | 0.21                        |                                       | 0.44                        |                                         | 0.58                        |
| With                       | 1.56 (1.18–2.07)                       |                             | 1.45 (1.11–1.90)                      |                             | 1.40 (1.10–1.78)                        |                             |
| Without                    | 1.25 (1.02–1.54)                       |                             | 1.27 (1.03–1.55)                      |                             | 1.28 (1.04–1.58)                        |                             |
| Smoking                    |                                        | 0.48                        |                                       | 0.69                        |                                         | 0.54                        |
| Yes                        | 1.42 (1.04–1.93)                       |                             | 1.38 (1.06–1.81)                      |                             | 1.41 (1.08–1.85)                        |                             |
| No                         | 1.23 (0.95–1.58)                       |                             | 1.29 (1.05–1.58)                      |                             | 1.27 (1.05–1.55)                        |                             |
| Drinking                   |                                        | 0.65                        |                                       | 0.59                        |                                         | 0.41                        |
| Yes                        | 1.42 (1.07–1.90)                       |                             | 1.41 (1.05–1.89)                      |                             | 1.46 (1.08–1.96)                        |                             |
| No                         | 1.31 (1.07–1.59)                       |                             | 1.28 (1.06–1.56)                      |                             | 1.26 (1.05–1.52)                        |                             |
| Walking speed <sup>c</sup> |                                        | 0.26                        |                                       | 0.13                        |                                         | 0.13                        |
| Fast                       | 1.24 (0.98–1.58)                       |                             | 1.18 (0.93–1.50)                      |                             | 1.18 (0.93–1.49)                        |                             |
| Slow                       | 1.50 (1.19–1.88)                       |                             | 1.52 (1.21–1.91)                      |                             | 1.51 (1.21–1.88)                        |                             |

SD, standard deviation; OR, odds ratio; CI, confidence interval.

<sup>a</sup>Adjusted for age, sex, and body mass index.

<sup>b</sup>It indicates the interaction effect.

<sup>c</sup>The upper half was defined as fast group and the lower one was as slow group.
